# Supplementary material for: ATG5 and ATG7 induced autophagy interplays with UPR via PERK signaling
Source: PubMed Central journal article supplement (PMC6503447; doi:10.1186/s12964-019-0353-3), 2019-05-06
Supplement: 12964_2019_353_MOESM1_ESM.pdf [file 12964_2019_353_MOESM1_ESM.pdf]

# Primer sequence

**ATG5-F(正向)**

5' GTCAGATCCGCTAG**AGATCT**GCTTACTAAGTTTGGCTTTGGTT 3'

**ATG5-R(反向)**

5' GATATCTTATCTAG**AAGCTT**AAGGGTGACATGCTCTGATAAAT 3'

**ATG7-F(正向)**

5'-GTCAGATCCGCTAG**AGATCT**AAATAATGGCGGCAGCTACGG -3'

**ATG7-R(反向)**

5'-GATATCTTATCTAG**AAGCTT**GGGCCATCTCAGATGGTCTCATC-3'

**Enzyme site: Bgl II、HindIII**

# pAdTrack-ATG7 plasmid endonuclease digesting and DNA sequencing

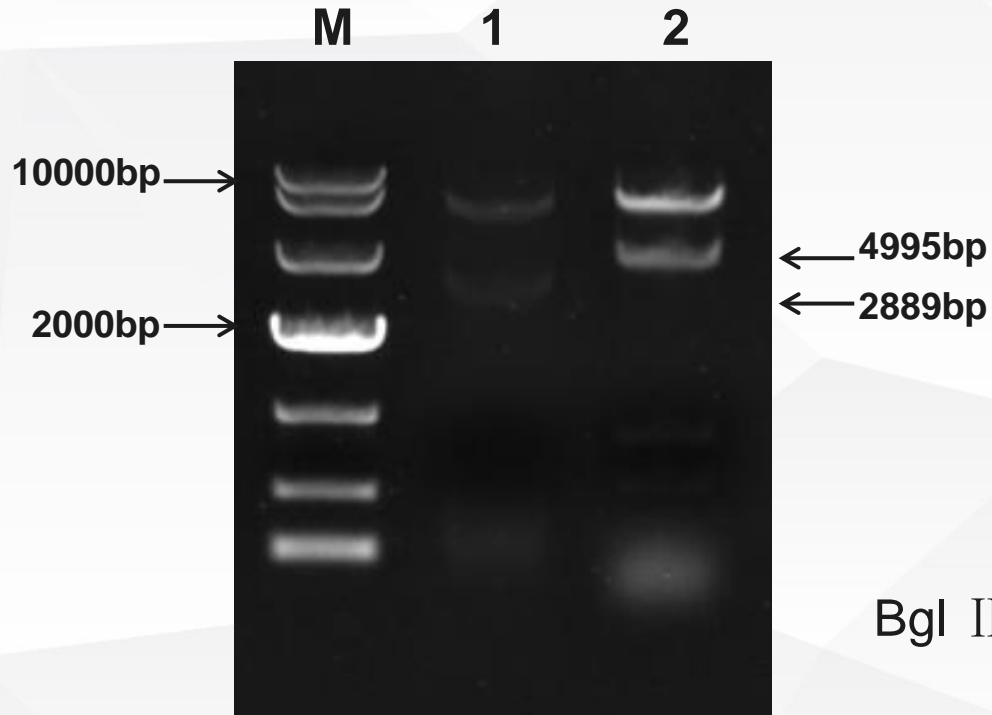

Bgl II 、 Hind III(pAdTrack-ATG7)

1: pAdTrack-CMV; 2: pAdTrack-ATG7

# ATG7 sequencing

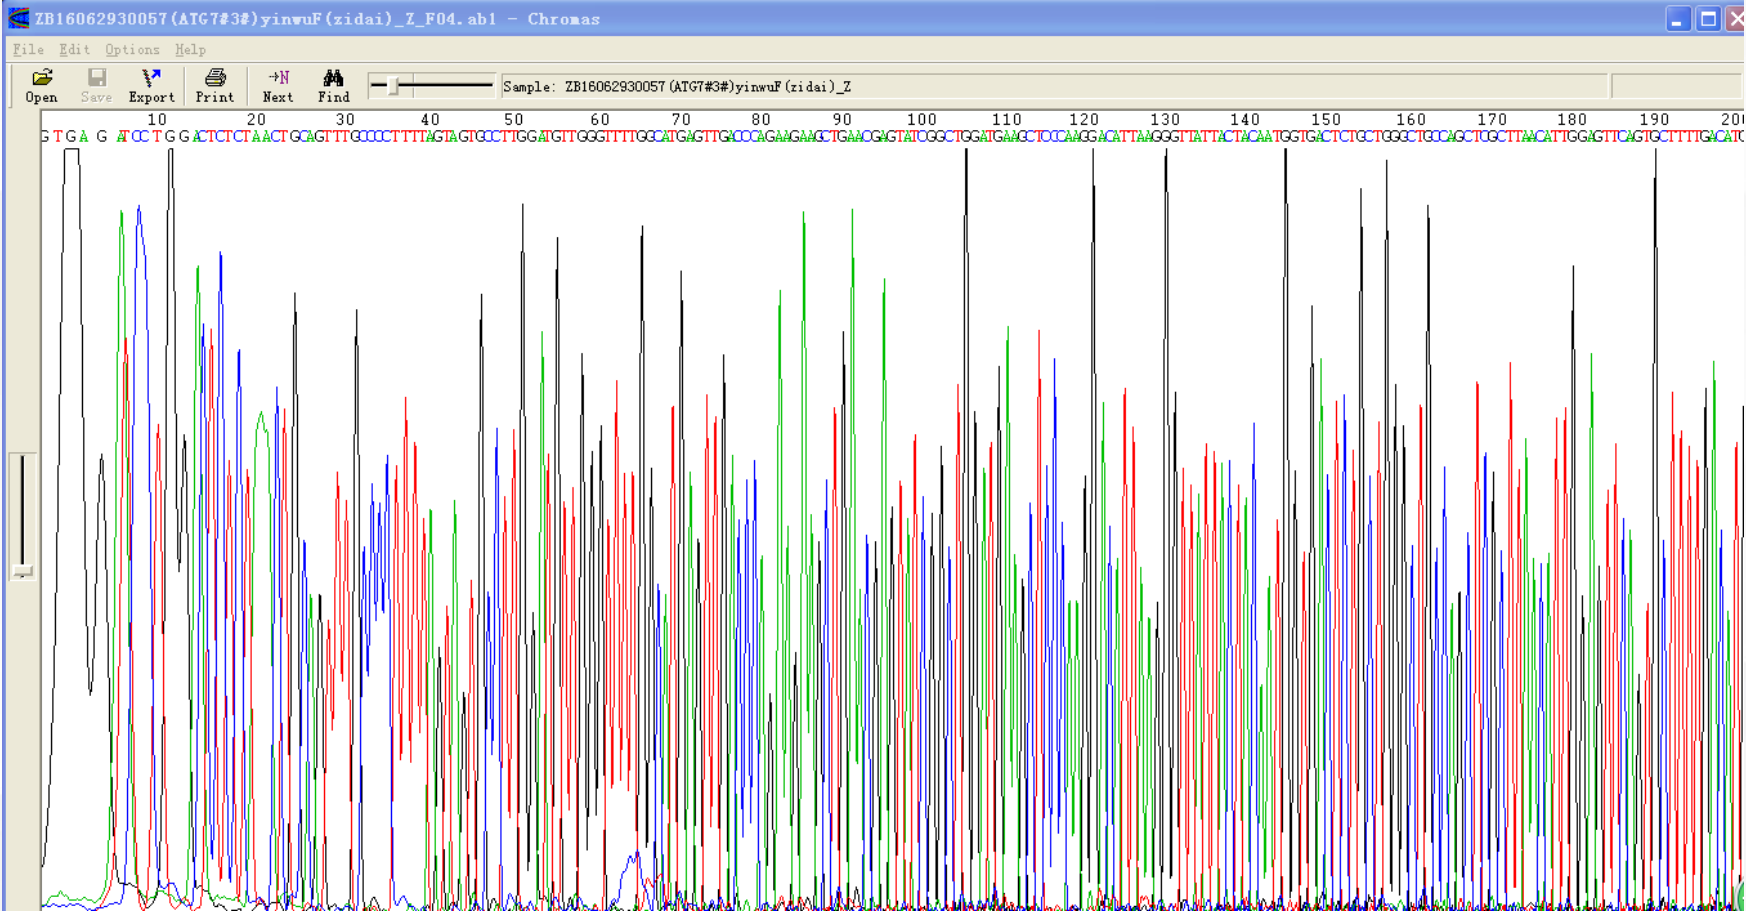

## ATG7 sequencing

GTGAGATCCTGGACTCTCTAACTGCAGTTTGCCCCTTTTAGTAGTGCCTTGGATGTTGGGTTTT  
GGCATGAGTTGACCCAGAAGAAGCTGAACGAGTATCGGCTGGATGAAGCTCCCAAGGACATT  
AAGGGTTATTACTACAATGGTGACTCTGCTGGGCTGCCAGCTCGCTTAACATTGGAGTTCAGT  
GCTTTTGACATGAGTGCTCCCACCCCAGCCCGTTGCTGCCCAGCTATTGGAACACTGTATAAC  
ACCAACACACTCGAGTCTTTCAAGACTGCAGATAAGAAGCTCCTTTTGGAAACAAGCAGCAAAT  
GAGATATGGGAATCCATAAAATCAGGCACTGCTCTTGAAAACCCTGTACTCCTCATCAAGTTCC  
TCCTCTTGACATTTGCAGATCTAAAGAAGCACCACCTTCTACTATTGGTTTTGCTATCCTGCCCTC  
TGTCTTCCAGAGAGTTTACCTCTCATTCAAGGGGCCAGTGGGTTTGGATCAAAGGTTTTCACTA  
AACAGATTGAAGCACTAGAGTGTGCATATGATAATCTTTGTCAAACAGAAGGAGTCACAGCTC  
TTCCTTACTTCTTAATCAAGTATGATGAGAACATGGTGCTGGTTTTCTTGCTTAAACACTACAGT  
GATTTCTTCCAAGGTCAAAGGACGAAGATAACAATTGGTGTATATGATCCCTGTAAGTTAGCCC  
AGTACCCTGGATGGCCTTTGAGGAATTTTTTGGTCCTAGCAGCCCACAGATGGAGTAGCAGTT  
TCCAGTCTGTTGAAGTTGTTTGGCTTCCGTGACCGTACCATGCAGGGGGCGAGAGACGTTGCC  
CACAGCATCATCTTCGAAGTGAAGCTTCCAGAAATGGCATTAGCCCAGATTGTCCTAAAGCA  
GTTGGGATGGGAAAAGAACCAGAAAGGAGGCATGGACCAAGATGGTGAACCTCAGTGATGTA  
TGGACCCTAAAGTTAGCTGAGTCATCAGTGGATCTAATCTCAACTGATGTGTGAGATGGCTACT  
TTAGACTGACAGTGTGTCTGTCAATGTCTGCTGCTGAGCGCACTGGAGCATGTAGCTAGACGT  
GATGGATGGGGCGTGGACCAATCACGGTTGTGGACAATGCCCAGATTCTCTAACTCCGATCTT  
GTGAAGTACCCTCTAGATTGGAATGCTAGGGTGTTGACCAAGTCCTTGGGGCA

# pAdTrack-ATG5 plasmid endonuclease digesting and DNA sequencing

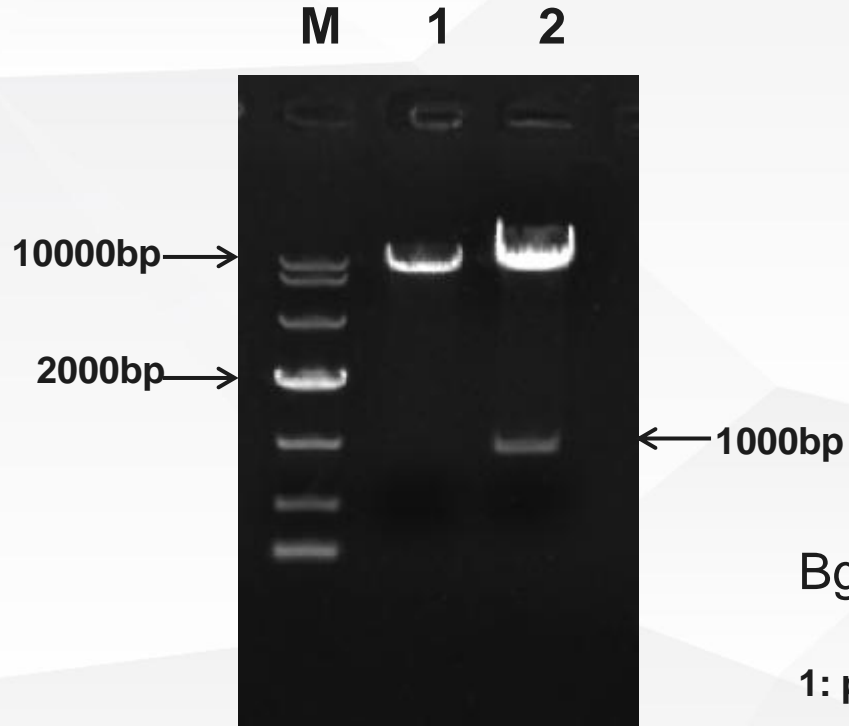

Bgl II、Hind III(pAdTrack-ATG5)

1: pAdTrack-CMV; 2: pAdTrack-ATG5

# ATG5 sequencing

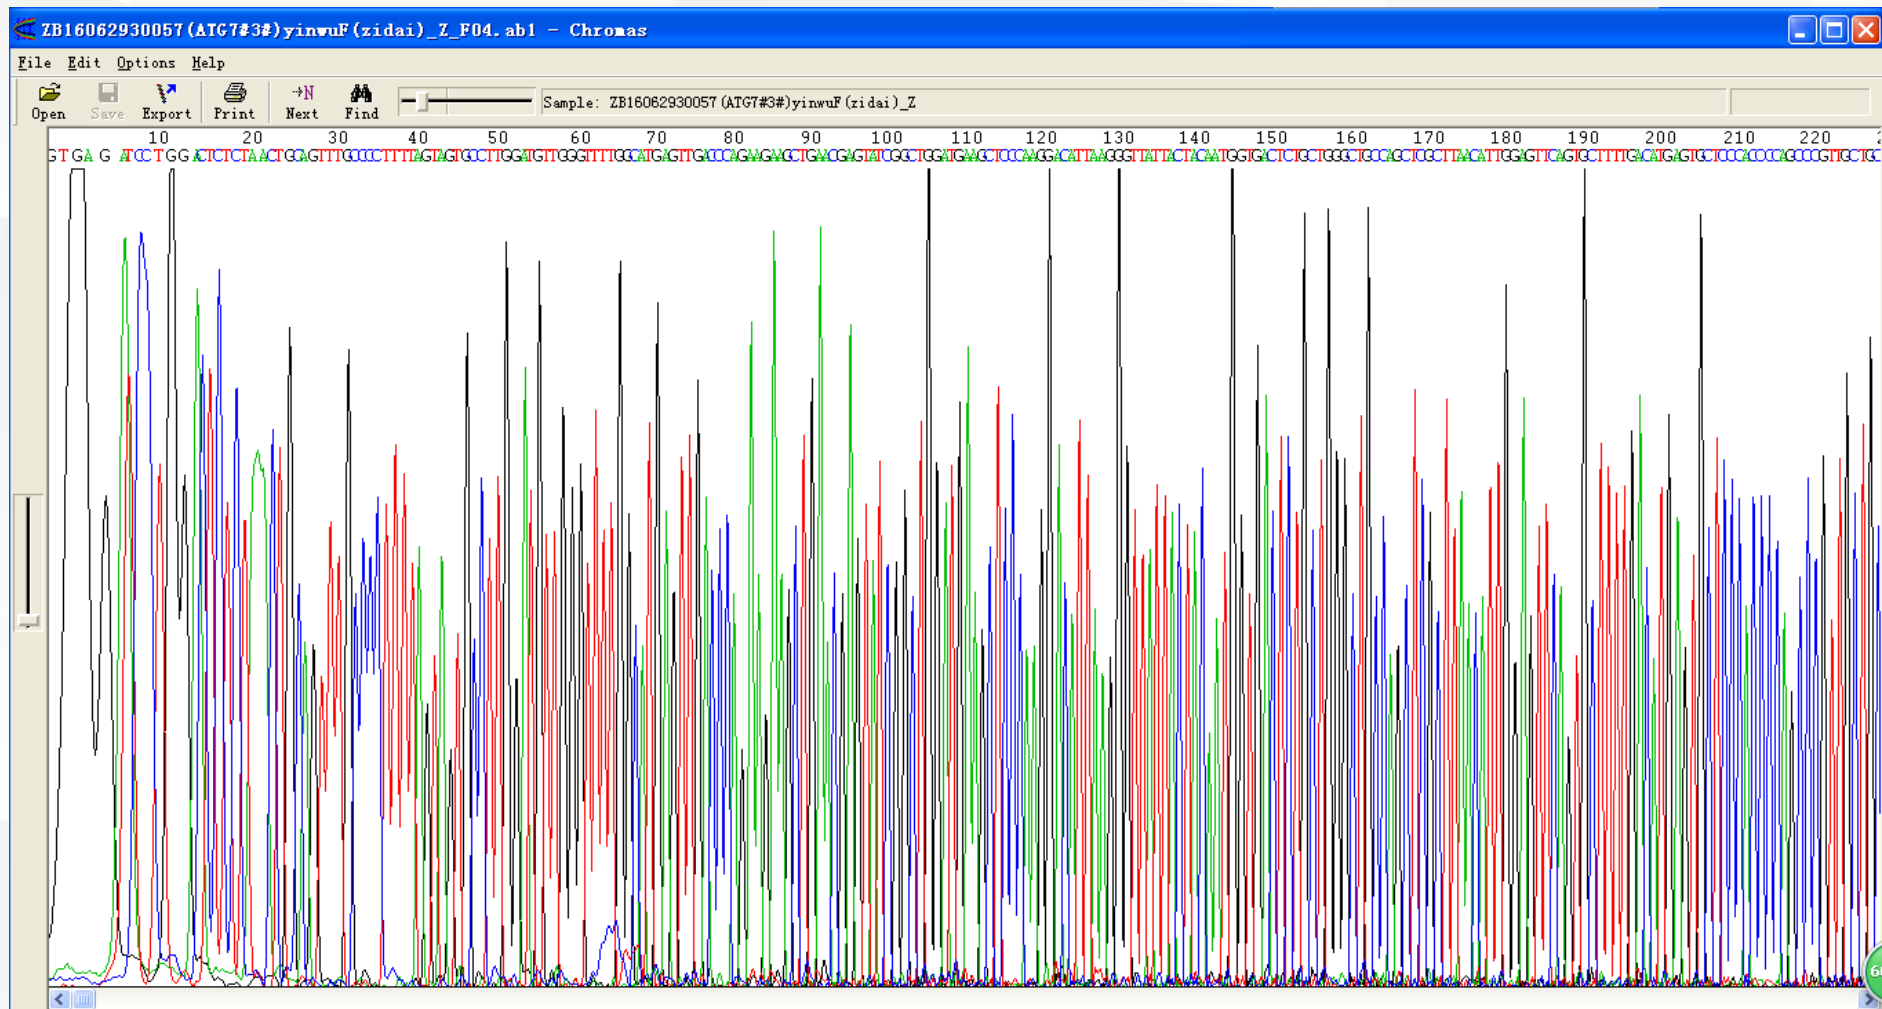

## ATG5 sequencing

AAGGAATAAAGAATTTAGCCTGTATGTACTGCTTTAACTCCTGGAAGAATGACAGATGACAAAGAT  
GTGCTTCGAGATGTGTGGTTTGGACGAATTCCAACCTTGTTTCACGCTATATCAGGATGAGATAAC  
TGAAAGGGAAGCAGAACCATACTATTTGCTTTTGCCAAGAGTAAGTTATTTGACGTTGGTAACTG  
ACAAAGTGAAAAAGCACTTTCAGAAGGTTATGAGACAAGAAGACATTAGTGAGATATGGTTTGAA  
TATGAAGGCACACCACTGAAATGGCATTATCCAATTGGTTTGCTATTTGATCTCCTTGCATCAAGT  
TCAGCTCTTCCTTGGAACATCACAGTACATTTTAAGAGTTTTCCAGAAAAAGACCTTCTGCACTG  
TCCATCTAAGGATGCAATTGAAGCTCATTTTATGTCATGTATGAAAGAAGCTGATGCTTTAAACAT  
AAAAGTCAAGTAATCAATGAAATGCGGAAAAAAGATCACAAGCAACTCTGGATGGGATTGCAAAA  
TGACAGATTTGACCAGTTTTGGGCCATCAATCGGAACTCATGGAATATCCTGCAGAAGAAAATG  
GATTCGTTATATCCCCTTTAGAATATATCAGACAACGACTGAAAGACCTTTCATTTCAGAAGCTGT  
TTCGTCCTGTGGCTGCAGATGGACAGTTGCACACACTAGGAGATCTCCTCAAAGAAGTTTGTCC  
TTCTGCTATTGATCCTGAAGATGGGGAAAAAAGAATCAAGTGATGATTCATGGAATTGAGCCAA  
CGTTGGAAACACCTCTGCAGTGGCTGAGTGAACATCTGAGCTACCCGGATAATTTTCTTCATATT  
AGTATCATCCCACAGCCAACAGATTGAAGGATCAACTATTTGCCTGAACAGAATCATCCTTAAATG  
GGATTTATCAGAGCATGTCACCCTTAAGCTTCTAGATAAGATATCCGATCCACCGGATCTAGATAA  
CTGATCATAATCAGCCATAACCACATTTGTAGAGGTTTTACTTGCTTTAAAAACCTCCCACACCTCC  
CCTGAACCTGAAACATAAATGATGCATTGTGTGTTAACTTGTTTTATTGCAGCTATATGGTACAAAT  
AAAGCATAGCATCACAAATTTACAAAATAAAGCATTTTTTCCACTGCCATCCTAGTGTGGTTGTC  
CAACTATCATGATCCTAACGCGGAGGTTTATCGACGACTGTCTAGTGATTATTAGGTTAATTC
